# Supplementary material for: Sex Differences in Healthcare Utilization and Costs among Individuals with Elevated Blood Pressure: The LARK Study from Western Kenya
Source: Research Square preprint supplement (doi:10.21203/rs.3.rs-108685/v1), 2020-11-18
Supplement: Supplementary file 1 [file a2fb9015f4780c8a3d7279ae.docx]

Supplemental Tables:

**For supplement:**

*Supplemental Table 1:* Comparison of different LCA models with different latent classes based on model selection statistics

|  | **AIC** | **BIC** |
| --- | --- | --- |
| **All** |  |  |
| 2 classes | 7960.7 | 8210.3 |
| 3 classes | 7731.9 | 8184.3 |
| 4 classes | 7964.2 | 8619.4 |

## *Supplement Table 2*: Description of demographics in each latent class

| Category | Value | Total N=1339 | Non-utilizers N=821 | Low-cost utilizers N=306 | High-cost utilizers N=212 |
| --- | --- | --- | --- | --- | --- |
| Gender |  |  |  |  |  |
|  | Female | 778 (58) | 439 (53) | 196 (64) | 143 (67) |
|  | Male | 561 (42) | 382 (47) | 110 (36) | 69 (33) |
| Age Group |  |  |  |  |  |
|  | <50 | 518 (39) | 314 (38) | 109 (36) | 95 (45) |
|  | 50-64 | 436 (33) | 276 (34) | 100 (33) | 60 (28) |
|  | >=65 | 385 (29) | 231 (28) | 97 (32) | 57 (27) |
| Monthly earnings |  |  |  |  |  |
|  | No Job | 293 (22) | 169 (21) | 80 (26) | 44 (21) |
|  | <5,000 ks | 708 (53) | 435 (53) | 155 (51) | 118 (56) |
|  | >=5,000 ks | 338 (25) | 217 (26) | 71 (23) | 50 (24) |
| Have NHIF |  |  |  |  |  |
|  | No | 1140 (85) | 711 (87) | 260 (85) | 169 (80) |
|  | Yes | 199 (15) | 110 (13) | 46 (15) | 43 (20) |

*Supplement table 3*. Relative risk of latent class membership probability compared to the largest, non-utilizer class.

|  | High-cost utilizers vs Non-Utilizers | Low-cost utilizers vs Non-Utilizers |
| --- | --- | --- |
| Age 50-64 vs <50 | 0.66 (0.44, 1.00) | 1.01 (0.71, 1.42) |
| Age >=65 vs <50 | 0.86 (0.55, 1.34) | 1.14 (0.79, 1.63) |
| Female vs Male | **1.77 (1.21, 2.58)** | **1.51 (1.10, 2.08)** |
| Earn < 5,000 KS vs No Job | 1.02 (0.65, 1.60) | **0.66 (0.45, 0.96)** |
| Earn >= 5,000 KS vs No Job | 0.93 (0.53, 1.63) | 0.68 (0.43, 1.09) |
| Have NHIF vs No NHIF | **2.07 (1.31, 3.26)** | 1.36 (0.90, 2.05) |

*95% confidence intervals shown in parentheses. Bolded values have confidence intervals that exclude 1.00.*
